# Supplementary material for: Genomic structure and marker-derived gene networks for growth and meat quality traits of Brazilian Nelore beef cattle
Source: PubMed Central journal article supplement (PMC4791965; doi:10.1186/s12864-016-2535-3), 2016-03-15

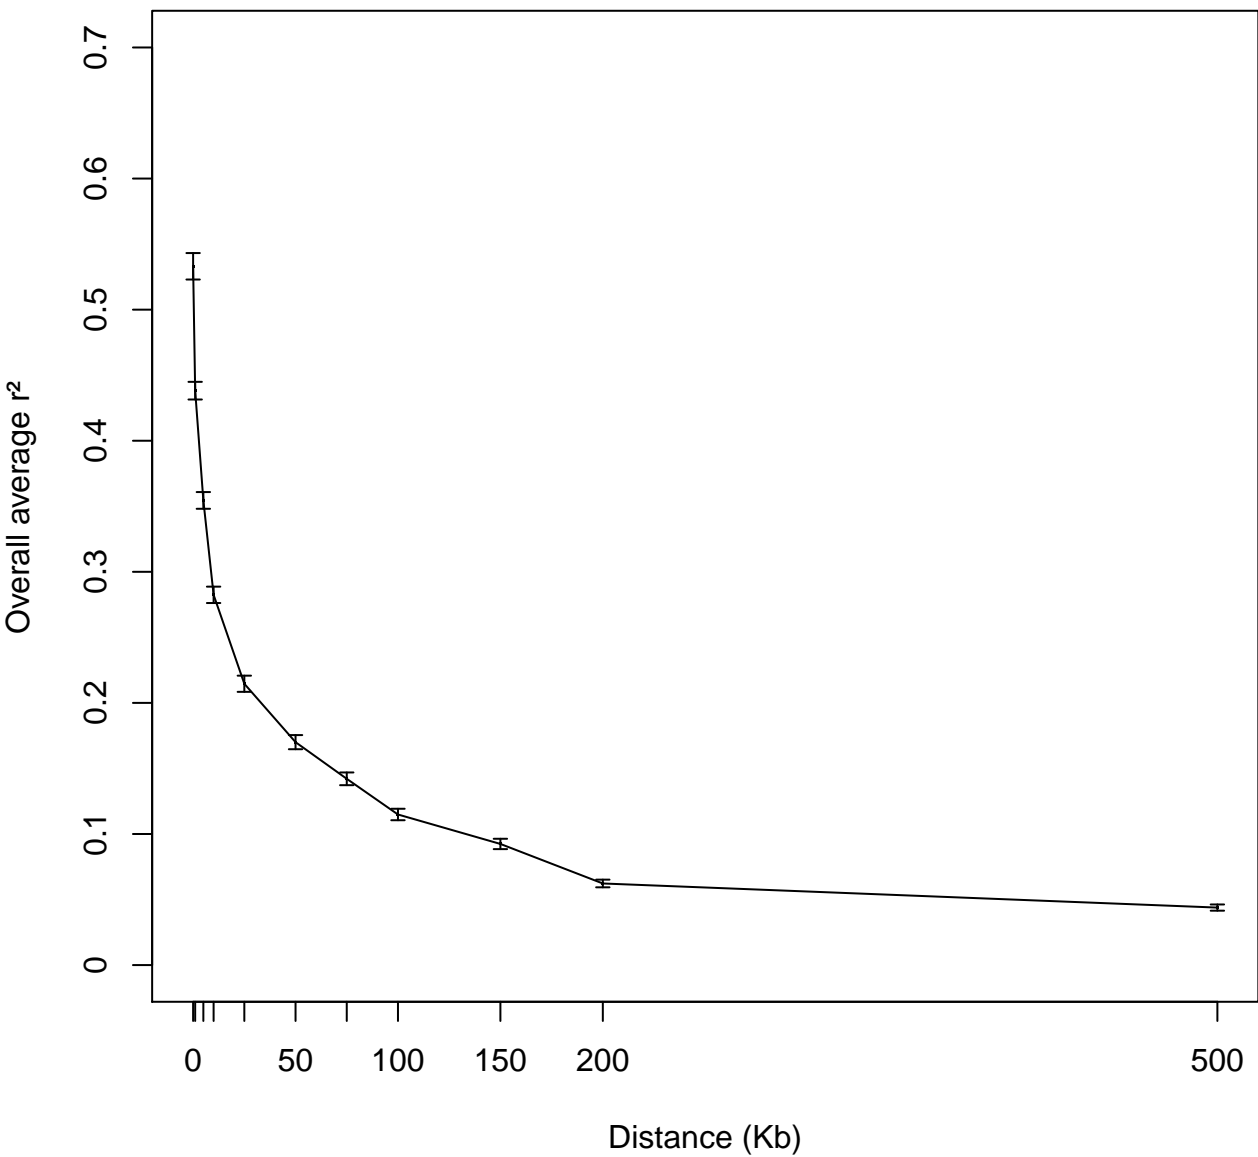

Supplement: 12864_2016_2535_MOESM2_ESM.pdf [file 12864_2016_2535_MOESM2_ESM.pdf]
